# Supplementary material for: Nutritional condition and physiological stress levels of elk in the Black Hills, South Dakota
Source: PeerJ. 2019 Jun 27;7:e7185. doi: 10.7717/peerj.7185 (PMC6599675; doi:10.7717/peerj.7185)
Supplement: Supplemental Information 1 [file peerj-07-7185-s001.xls]

## Sheet: Sheet1
Number	Elk ID #	FREQ	GPS_VHF	Sex	Age	age	girth	Weight_form	weight	body	fat	loin	nutrition	year	group	pregnancy	Lactating
1	Elk01	155.2	GPS	F	A	5	142	263.46	263.46	2.75	5.54	44	6.9339	2011	A	1
2	Elk02	154.56	VHF	F	A	14	143	266.22	266.22	2.5	4.1	39.8	6.334	2011	A	1
3	Elk03	155.26	GPS	F	A	10	147	277.26	277.26	3.5	5.91	45.65	6.9963	2011	A	0
4	Elk04	155.25	GPS	F	A	8	152	291.06	291.06	2	1.18	41.5	3.8728	2011	A	1
5	Elk05	154.61	VHF	F	A	7	148	280.02	280.02	3.75	7.24	51.74	7.4983	2011	A	1
6	Elk06	154.6	VHF	F	A	2	145	271.74	271.74	3	4.53	45.5	6.4806	2011	A	0
7	Elk07	154.25	VHF	F	A	6	143	266.22	266.22	2.5	2.59	48.94	6.2238	2011	A	1
8	Elk08	155.19	GPS	F	A	9	149	282.78	282.78	2	1.85	46.02	3.8728	2011	A	1
9	Elk09	155.16	GPS	F	A	9	152	291.06	291.06	2.75	3.7	39.73	6.7387	2011	A	1
10	Elk10	155.35	GPS	F	A	4	146	274.5	274.5	4	11.43	55.94	9.1973	2011	A	1
11	Elk12	155.17	GPS	F	A	10	138	252.42	252.42	2.5	1.85	46.57	6.2238	2011	A	1
12	Elk13	155.22	GPS	F	A	3	140	257.94	257.94	2.5	2.46	47.8	6.2238	2011	A	1
13	Elk14	155.15	GPS	F	A	14	151	288.3	288.3	2.75	3.23	47.24	6.6538	2011	A	1
14	Elk15	154.58	VHF	F	A	3	145	271.74	271.74	4	8.78	47	8.1745	2011	A	1
15	Elk16	155.01	GPS	F	A	6	147.5	278.64	278.64	2.75	6.25	43.55	7.121	2011	A	1
16	Elk17	154.63	VHF	F	A	3	135	244.14	244.14	3.75	8.62	41.12	8.3959	2011	A	1
17	Elk18	155.4	GPS	F	A	6	145	271.74	271.74	4	14.05	43.24	10.275	2011	A	1
18	Elk19	154.49	VHF	F	A	4	149	282.78	282.78	2.75	3.88	44.91	6.7883	2011	A	1
19	Elk20	155.3	GPS	F	A	2	137	249.66	249.66	4.5	13.37	47.86	10.3497	2011	A	1
20	Elk21	155.27	GPS	F	A	4	148	280.02	280.02	2	1.94	46.8	3.8728	2011	A	1
21	Elk22	155.24	GPS	F	A	9	151	288.3	288.3	2.75	6.47	46.14	7.1455	2011	A	1
22	Elk23	155.5	GPS	F	A	6	151	288.3	288.3	1.5	1.29	40.32	1.5218	2011	A	1
23	Elk24	154.54	VHF	F	A	8	142	263.46	263.46	2	2.71	40.9	3.8728	2011	A	1
24	Elk25	154.64	VHF	F	A	10	148	280.02	280.02	1.5	1.08	42.04	1.5218	2011	A	1
25	Elk26	155.23	GPS	F	A	4	154	296.58	296.58	2.75	4.31	47	6.2877	2011	A	1
26	Elk27	155.6	GPS	F	A	6	143	266.22	266.22	1.5	0.86	50.53	1.5218	2011	A	1
27	Elk28	155.21	GPS	F	A	3	151	288.3	288.3	2.5	2.71	48.79	6.2238	2011	A	1
28	Elk29	154.34	VHF	F	A	5	153	293.82	293.82	2.5	6.65	49.03	7.1799	2011	A	1
29	Elk30	154.352	VHF	F	A	13	147	277.26	277.26	2	1.72	47.65	3.8728	2011	A	0
30	Elk31	154.5	VHF	F	A	7	142	263.46	263.46	3.5	7.11	38.81	7.5741	2011	A	0
31	Elk32	154.42	VHF	F	A	7	155	299.34	299.34	1.5	1.72	41.64	1.5218	2011	A	1
32	Elk33	154.08	VHF	F	A	14	145	271.74	271.74	2	1.66	44.07	3.8728	2011	A	0
33	Elk34	155.18	GPS	F	A	13	157	304.86	304.86	2	1.67	38.26	3.8728	2011	A	0
34	Elk35	155.55	GPS	F	A	6	153	293.82	293.82	3.5	4.1	44.85	6.2194	2011	A	1
35	Elk36	154.62	VHF	F	A	4	151	288.3	288.3	3.75	13.71	50.25	9.91	2011	A	1
36	Elk37	154.14	VHF	F	A	6	151	288.3	288.3	4	7.76	56.27	7.6381	2011	A	1
37	Elk38	154.06	VHF	F	A	10	143	266.22	266.22	3	5.17	46.38	6.76694	2011	A	1
38	Elk39	154.36	VHF	F	A	3	142	263.46	263.46	3	4.44	41.4	6.48542	2011	A	1
39	Elk40	154.291	VHF	F	A	4	149	282.78	282.78	3.5	4.93	42.66	6.5839	2011	A	1
40	Elk01	155.2	GPS	F	A	6	150.5	286.92	286.92	4.5	13.3	53.81	9.77105	2012	B	1	0
41	Elk02	154.52	GPS	F	A	15	140	257.94	257.94	2.75	3.8	46.1	6.8241	2012	B	1	1
42	Elk03	155.25	GPS	F	A	9	156.2	302.652	302.652	4.5	11.6	50.3	8.9533	2012	B	1	0
43	Elk04	155.35	GPS	F	A	8	154.3	297.408	297.408	4.5	14.2	49.51	9.97774	2012	B	1	1
44	Elk05	154.96	GPS	F	A	3	158	307.62	307.62	4.5	11.2	62.4	8.75844	2012	B	1	0
45	Elk06	154.17	GPS	F	A	7	160	313.14	313.14	3.75	8	50.31	7.55541	2012	B	1
46	Elk07	154.16	GPS	F	A	5	149	282.78	282.78	4	5.9	50.5	6.95948	2012	B	1
47	Elk08	154.47	GPS	F	A	7	154	296.58	296.58	3.5	4.9	52.27	6.50846	2012	B	1	0
48	Elk09	155.19	GPS	F	A	10	149	282.78	282.78	3.5	4.5	54.04	6.4174	2012	B	1	0
49	Elk10	155.16	GPS	F	A	10	155	299.34	299.34	3.5	3.8	46.8	6.74337	2012	B	1
50	Elk11	154.69	GPS	F	A	4	145	271.74	271.74	4.5	7.9	53.1	7.82378	2012	B	1
51	Elk12	154.66	GPS	F	A	8	147	277.26	277.26	3.5	2.9	45.41	7.39923	2012	B	1
52	Elk13	154.67	GPS	F	A	11	154	296.58	296.58	3.25	2.95	53.34	7.39923	2012	B	1
53	Elk14	154.94	GPS	F	A	8	159	310.38	310.38	4	4.6	46.58	6.34159	2012	B	1
54	Elk15	154.57	GPS	F	A	2	137	249.66	249.66	3	6.18	49.62	7.29801	2012	B	1	1
55	Elk16	155.17	GPS	F	A	11	149.5	284.16	284.16	3.25	3.65	51.8	6.15354	2012	B	1	1
56	Elk17	155.22	GPS	F	A	4	144	268.98	268.98	3	2.76	52.4	6.22375	2012	B	1	0
57	Elk18	154.7	GPS	F	A	4	145	271.74	271.74	3	4.1	45.02	6.30918	2012	B	1	0
58	Elk19	155.4	GPS	F	A	5	148.5	281.4	281.4	3.25	4.56	54.05	6.4469	2012	B	1	1
59	Elk20	155.3	GPS	F	A	3	146	274.5	274.5	3.75	5.12	56.36	6.70072	2012	B	1
60	Elk21	154.2	GPS	F	A	14	149	282.78	282.78	2.5	3.08	50.07	6.04566	2012	B	0
61	Elk22	154.991	GPS	F	A	4	145	271.74	271.74	3	4.6	56.85	6.50847	2012	B	1
62	Elk24	155.27	GPS	F	A	5	154	296.58	296.58	3.75	10.01	48.72	8.4205	2012	B	1	0
63	Elk25	155.24	GPS	F	A	10	156.5	303.48	303.48	3.25	5.89	46.62	6.84314	2012	B	1	1
64	Elk26	154.98	GPS	F	A	5	158	307.62	307.62	3.5	3.6	51.94	6.69338	2012	B	1	1
65	Elk27	155.5	GPS	F	A	7	150	285.54	285.54	4	6	45.4	6.98197	2012	B	1	0
66	Elk28	154.28	GPS	F	A	9	154.8	298.788	298.788	3.25	7.7	44.48	7.54096	2012	B	1
67	Elk29	155.15	GPS	F	A	11	160	313.14	313.14	3.5	4.9	44.5	6.43925	2012	B	1	0
68	Elk30	154.45	GPS	F	A	4	146	274.5	274.5	4.5	5.1	50.1	6.69281	2012	B	1	0
69	Elk31	154.31	GPS	F	A	5	160	313.14	313.14	2	2.57	49.38	3.8728	2012	B	1	0
70	Elk32	155.6	GPS	F	A	7	141	260.7	260.7	3.75	4.9	50.08	6.68862	2012	B	1	0
71	Elk33	155.21	GPS	F	A	4	158	307.62	307.62	2.5	5.82	50.54	6.79693	2012	B	1	0
72	Elk34	155.23	GPS	F	A	6	147	277.26	277.26	3.5	4.6	58.48	6.48177	2012	B	1	0
73	Elk35	154.68	GPS	F	A	14	147	277.26	277.26	4.5	11.6	52.87	9.2312	2012	B	1	0
74	Elk36	155.26	GPS	F	A	8	157	304.86	304.86	3	3.8	43.55	6.73427	2012	B	1
75	Elk37	154.5	GPS	F	A	15	145	271.74	271.74	2.5	6.1	47.28	7.10634	2012	B	1	0
76	Elk38	155.18	GPS	F	A	14	146	274.5	274.5	2.5	1.9	50.54	3.8728	2012	B	0	1
77	Elk39	155.55	GPS	F	A	7	149	282.78	282.78	4.5	11.3	48.2	9.05037	2012	B	1	0
78	Elk40	154.18	GPS	F	A	9	151	288.3	288.3	3.75	5.22	52.17	6.66821	2012	B	1
79	Elk41	154.97	GPS	F	A	5	146	274.5	274.5	3.25	6.8	45.41	7.36541	2012	B	1
80	Elk01	155.2	GPS	F	A	7	141	260.7	260.7	1.5	2.1	43.09	1.52185	2013	C	1	1
81	Elk02	154.52	GPS	F	A	16	144	268.98	268.98	1.5	1.4	39.2	1.52185	2013	C	0	1
82	Elk03	155.25	GPS	F	A	10	143	266.22	266.22	1.5	1.86	47.28	1.52185	2013	C	1	1
83	Elk04	155.35	GPS	F	A	9	157	304.86	304.86	4	10.48	58.5	8.52036	2013	C	1	0
84	Elk05	154.96	GPS	F	A	4	158	307.62	307.62	3.75	7.69	52.9	7.47872	2013	C	1	0
85	Elk06	154.16	GPS	F	A	6	154	296.58	296.58	3.75	7.69	47.06	7.55241	2013	C	1	0
86	Elk07	154.45	GPS	F	A	6	158	307.62	307.62	4.5	11.65	54.3	8.9225	2013	C	1	0
87	Elk08	155.15	GPS	F	A	15	141	260.7	260.7	2	1.16	46.61	3.8728	2013	C	0	1
88	Elk09	155.19	GPS	F	A	11	147	277.26	277.26	2	1.86	54.7	3.8728	2013	C	1	1
89	Elk10	155.16	GPS	F	A	11	155	299.34	299.34	2.5	4.12	47.2	6.20646	2013	C	1	0
90	Elk11	154.66	GPS	F	A	9	160	313.14	313.14	2	1.88	48.44	3.8728	2013	C	1	1
91	Elk12	154.67	GPS	F	A	6	146	274.5	274.5	2.5	1.88	46.35	6.22375	2013	C	1	0
92	Elk13	154.94	GPS	F	A	9	148	280.02	280.02	4.5	7.45	45.88	7.58021	2013	C	1	0
93	Elk14	154.68	GPS	F	A	5	151	288.3	288.3	3	5.13	56.3	6.63384	2013	C	1
94	Elk15	155.6	GPS	F	A	8	153	293.82	293.82	3	5.36	59.6	6.69402	2013	C	1
95	Elk16	155.3	GPS	F	A	4	150	285.54	285.54	2	1.86	56.6	3.8728	2013	C	1	1
96	Elk17	154.47	GPS	F	A	8	154	296.58	296.58	3.75	7.46	48.7	7.46635	2013	C	1	0
97	Elk18	154.57	GPS	F	A	3	148	280.02	280.02	3.5	3.97	54.5	8.5744	2013	C	1	0
98	Elk19	155.17	GPS	F	A	12	145	271.74	271.74	2.5	4.19	45.43	6.34505	2013	C	1	1
99	Elk20	155.22	GPS	F	A	5	150	285.54	285.54	2.5	4.2	54	6.28988	2013	C	1	1
100	Elk21	154.7	GPS	F	A	5	148	280.02	280.02	1.5	1.4	49.3	1.52185	2013	C	1	1
101	Elk22	155.4	GPS	F	A	6	153	293.82	293.82	2.5	7.69	58	7.57169	2013	C	0	0
102	Elk23	154.2	GPS	F	A	15	158	307.62	307.62	2.5	1.86	52.87	6.22375	2013	C	1	0
103	Elk24	154.991	GPS	F	A	5	146	274.5	274.5	2	1.4	52.17	3.8728	2013	C	1	1
104	Elk25	151.44	GPS	F	A	2	144	268.98	268.98	2	1.86	50.1	3.8728	2013	C	1	1
105	Elk26	155.27	GPS	F	A	6	153	293.82	293.82	3.75	8.62	52.4	7.92201	2013	C	1	0
106	Elk27	155.24	GPS	F	A	11	150	285.54	285.54	2	1.65	49.6	3.8728	2013	C	1	1
107	Elk28	154.98	GPS	F	A	6	161	315.9	315.9	3.75	6.99	48.45	7.17629	2013	C	1	0
108	Elk29	155.5	GPS	F	A	8	154	296.58	296.58	2	2.33	48.9	3.8728	2013	C	1	1
109	Elk30	154.28	GPS	F	A	10	154	296.58	296.58	2	1.63	47.1	3.8728	2013	C	1	1
110	Elk31	154.31	GPS	F	A	6	159	310.38	310.38	4.5	14.21	56.83	9.82331	2013	C	1	0
111	Elk32	154.69	GPS	F	A	5	149	282.78	282.78	3	8.16	55.2	7.83456	2013	C	1	0
112	Elk33	154.62	VHF	F	A	6	157	304.86	304.86	3.75	11.18	50.1	8.77721	2013	C	1	0
113	Elk34	155.21	GPS	F	A	5	154.5	297.96	297.96	2	1.16	49.3	3.8728	2013	C	1	1
114	Elk35	155.23	GPS	F	A	7	150	285.54	285.54	3.5	4.9	60.3	6.55902	2013	C	1	0
115	Elk36	155.26	GPS	F	A	9	158	307.62	307.62	2	1.86	49.2	3.8728	2013	C	1	1
116	Elk37	154.5	GPS	F	A	16	159	310.38	310.38	2	1.63	49.02	3.8728	2013	C	1	1
117	Elk38	155.18	GPS	F	A	9	153	293.82	293.82	2.5	3.96	46.84	6.19521	2013	C	1	0
118	Elk39	155.55	GPS	F	A	8	151	288.3	288.3	1.5	1.86	51.7	1.52185	2013	C	1	1
119	Elk40	154.18	GPS	F	A	10	153	293.82	293.82	2.5	3.97	55.21	6.19709	2013	C	1	0
120	Elk41	154.97	GPS	F	A	6	153	293.82	293.82	1.5	1.86	47.04	1.52185	2013	C	0	1
121	Elk42	154.17	GPS	F	A	6	147	277.26	277.26	2.5	3.5	49.85	6.13673	2013	C	1	0
